# Supplementary material
Source: PubMed Central journal article supplement (PMC5824235)

## Supplementary Online Content

Berry DA, Zhou S, Higley H, Mukundan L, Fu S, et al. Association of minimal residual disease with clinical outcome in pediatric and adult acute lymphoblastic leukemia: a meta-analysis [published online May 11, 2017]. *JAMA Oncol*. doi:10.1001/jamaoncol.2017.0580

**eTable 1.** Characteristics of the studies included in this meta-analysis

**eTable 2.** Hazard ratios of EFS and OS and their respective Bayesian 95% credible intervals for each subgroup of patients in pediatric and adult ALL

**eFigure 1.** Hazard ratios of EFS and their 95% confidence intervals for the individual studies used in our pediatric ALL meta-analysis

**eFigure 2.** Hazard ratios of EFS and their 95% confidence intervals for the individual studies used in our pediatric ALL meta-analysis

This supplementary material has been provided by the authors to give readers additional information about their work.

**eTable 1.** Characteristics of the studies included in this meta-analysis

| Age group | First author | Year publish | MRD Detection | MRD cut-off (%) | MRD assessment period | Cytogenesis | Cell phenotype | Total sample size (MRD/no MRD) | Random or cohort | Med. follow-up (yrs) | Survival End Point | PMID     |
|-----------|--------------|--------------|---------------|-----------------|-----------------------|-------------|----------------|--------------------------------|------------------|----------------------|--------------------|----------|
| Ped       | Vilmer       | 2000         | PCR           | 0.5             | Induction             |             |                | 150(61/89)                     | Random           | 6.9                  | EFS                | 12796792 |
| Ped       | Imashuku     | 2003         | PCR           | 0.1             | Other                 |             |                | 67(12/55)                      | Cohort           | 1.13                 | EFS                | 21596436 |
| Ped       | Zhou         | 2007         | PCR           | 0.1             | Induction             |             | B-cell         | 284(38/246)                    | Random           | 5.6                  | EFS                | 21370437 |
| Ped       | Flohr        | 2008         | PCR           | 0.01            | Induction             |             |                | 129(74/55)                     | Random           | NA                   | EFS                | 26124497 |
| Ped       | Borowitz     | 2008         | FC            | 0.01            | Induction             |             | B-cell         | 1971(383/1588)                 | Random           | NA                   | EFS                | 23265714 |
| Ped       | Velden       | 2009         | PCR           | 0.01            | Induction             |             | B-cell         | 54(30/24)                      | Random           | 4.83                 | EFS                | 19880498 |
| Ped       | Conter       | 2010         | mixed         | 0.04            | Induction             | Ph-         |                | 1537 (189/1348)                | Random           | 4.0                  | EFS                | 18388178 |
| Ped       | Kang         | 2010         | FC            | 0.01            | Induction             |             |                | 191(67/124)                    | Cohort           | NA                   | EFS                | 24692146 |
| Ped       | Stow         | 2010         | mixed         | 1               | Induction             |             | B-cell         | 379(63/316)                    | Cohort           | NA                   | EFS                | 24924991 |
| Ped       | Meleshko     | 2011         | PCR           | 0.01            | Induction             |             |                | 61(22/39)                      | Cohort           | 3.5                  | EFS                | 24497539 |
| Ped       | Bowman       | 2011         | FC            | 0.01            | Induction             |             | B-cell         | 245(84/161)                    | Cohort           | NA                   | EFS                | 20304809 |
| Ped       | Foster       | 2011         | FC            | 0.1             | Other                 |             |                | 116(18/98)                     | Cohort           | NA                   | EFS                | 19212338 |
| Ped       | Chen         | 2012         | FC            | 0.01            | Induction             |             | B-cell         | 964(220/744)                   | Cohort           | NA                   | EFS                | 18239620 |
| Ped       | Eckert       | 2013         | PCR           | 0.1             | Induction             |             |                | 208(99/109)                    | Random           | 4.8                  | EFS/OS             | 21360654 |
| Ped       | Eckert       | 2013         | PCR           | 0.1             | Induction             |             | B-cell         | 80(34/46)                      | Random           | NA                   | EFS/OS             | 22368272 |
| Ped       | Vora         | 2013         | PCR           | 0.01            | Induction             |             |                | 2120(1030/1090)                | Random           | 3.83                 | EFS                | 11187917 |
| Ped       | Pulsipher    | 2014         | FC            | 0.01            | Other                 |             |                | 105(17/88)                     | Random           | 2.17                 | EFS                | 23775972 |
| Ped       | Salah-Eldin  | 2014         | PCR           | 0.1             | Induction             |             | B-cell         | 46(34/12)                      | Cohort           | 1.38                 | EFS/OS             | 25312094 |
| Ped       | Sutton       | 2015         | PCR           | 1               | Other                 |             |                | 69(31/38)                      | Cohort           | 4.8                  | EFS/OS             | 20154213 |
| Ped       | Borowitz     | 2015         | FC            | 0.1             | Induction             | Ph-         | B-cell         | 2473(685/1788)                 | Random           | NA                   | EFS/OS             | 17485550 |
| Adult     | Mortuza      | 2002         | PCR           | 0.1             | Consol'n              | Ph-         |                | 36(17/19)                      | Random           | NA                   | EFS                | 24752047 |
| Adult     | Krampera     | 2003         | FC            | 0.01            | Induction             |             | T-cell         | 47(18/29)                      | Cohort           | 1.42                 | EFS                | 24740809 |
| Adult     | Stirewalt    | 2003         | PCR           |                 | Other                 | Ph+         |                | 63 (33/30)                     | Cohort           | 0.77                 | EFS                | 12652472 |
| Adult     | Pane         | 2005         | PCR           | 0.1             | Consol'n              | Ph+         |                | 42(14/28)                      | Cohort           | 1.18                 | EFS/OS             | 16195338 |
| Adult     | Bruggemann   | 2006         | PCR           | 0.01            | Induction             |             |                | 111(38/73)                     | Cohort           | 4.58                 | EFS                | 18492099 |
| Adult     | Raff         | 2007         | PCR           | 0.01            | Other                 |             |                | 105(28/77)                     | Cohort           | 1.34                 | EFS                | 22442346 |
| Adult     | Spinelli     | 2007         | PCR           | 0.1             | Other                 |             |                | 37(25/12)                      | Cohort           | 1.92                 | OS                 | 11844835 |
| Adult     | Holowieck    | 2008         | FC            | 0.1             | Induction             | Ph-         |                | 116(38/78)                     | Cohort           | 1.42                 | EFS                | 19863538 |
| Adult     | Bassan       | 2009         | PCR           | 0.01            | Induction             |             |                | 112(54/58)                     | Cohort           | 3.0                  | EFS                | 15744351 |
| Adult     | Patel        | 2010         | PCR           | 0.01            | Induction             | Ph-         | B-cell         | 64(20/44)                      | Random           | 4.83                 | EFS                | 23836561 |
| Adult     | Lee          | 2012         | PCR           | 0.1             | Other                 | Ph+         |                | 95(62/33)                      | Cohort           | 5.0                  | EFS                | 17488684 |
| Adult     | Gokbuget     | 2012         | PCR           | 0.01            | Consol'n              | Ph-         |                | 504(120/384)                   | Cohort           | NA                   | EFS/OS             | 24961645 |
| Adult     | Ravandi      | 2013         | PCR           | 0.1             | Induction             | Ph+         |                | 62(26/36)                      | Cohort           | 1.05                 | EFS/OS             | 22705993 |
| Adult     | Tucunduva    | 2014         | mixed         | 0.1             | Other                 | Ph+         |                | 98(59/39)                      | Cohort           | 3.0                  | EFS                | 19141862 |
| Adult     | Beldjord     | 2014         | PCR           | 0.01            | Induction             | Ph-         | B/T-cell       | 423(158/265)                   | Random           | 4.0                  | EFS                | 12492579 |
| Adult     | Ribera       | 2014         | FC            | 0.05            | Consol'n              | Ph-         |                | 161                            | Cohort           | 3.75                 | EFS/OS             | 17023577 |
| A & P     | Vidriales    | 2003         | FC            | 0.05            | Induction             |             |                | 87(44/43)                      | Cohort           | 2.42                 | EFS/OS             | 21710165 |
| A & P     | Zhao         | 2012         | mixed         | 0.01            | Other                 |             |                | 139(33/106)                    | Cohort           | 2.67                 | EFS/OS             | 22430088 |
| A & P     | Bachanova    | 2012         | FC            | 0.1             | Other                 |             |                | 86(10/76)                      | Cohort           | 3.9                  | EFS/OS             | 12586618 |

**eTable 2.** Hazard ratios of EFS and OS and their respective Bayesian 95% credible intervals for each subgroup of patients in pediatric and adult ALL. Studies not included were either mixtures of subgroups or subgroup status was not indicated in the publications. See forest plots comparing pediatric and adult ALL studies in Figures 4A and 4B.

| Subgroup        | Event-free Survival (EFS)  |                   |                        |                   | Overall Survival (OS) |                   |           |                   |
|-----------------|----------------------------|-------------------|------------------------|-------------------|-----------------------|-------------------|-----------|-------------------|
|                 | Pediatric ALL (20 studies) |                   | Adult ALL (16 studies) |                   | Pediatric ALL         |                   | Adult ALL |                   |
|                 | # studies                  | HR (95% BCI)      | # studies              | HR (BCI)          | # studies             | HR (95% BCI)      | # studies | HR (BCI)          |
| Analysis method |                            |                   |                        |                   |                       |                   |           |                   |
| Flow Cytometry  | 7                          | 0.27 (0.20, 0.36) | 3                      | 0.32 (0.20, 0.51) | 1                     | 0.27 (0.22, 0.34) | 1         | 0.28 (0.13, 0.61) |
| PCR             | 11                         | 0.20 (0.11, 0.35) | 12                     | 0.24 (0.18, 0.32) | 4                     | 0.23 (0.09, 0.58) | 4         | 0.29 (0.18, 0.49) |
| Analysis cutoff |                            |                   |                        |                   |                       |                   |           |                   |
| ≤ 0.01%         | 9                          | 0.30 (0.20, 0.46) | 7                      | 0.29 (0.21, 0.39) | 0                     | --                | 1         | 0.25 (0.18, 0.35) |
| > 0.01%         | 11                         | 0.18 (0.11, 0.29) | 8                      | 0.21 (0.14, 0.32) | 5                     | 0.23 (0.12, 0.47) | 4         | 0.30 (0.18, 0.50) |
| Period assessed |                            |                   |                        |                   |                       |                   |           |                   |
| Induction       | 16                         | 0.20 (0.15, 0.28) | 7                      | 0.33 (0.24, 0.44) | 4                     | 0.25 (0.11, 0.57) | 1         | 0.54 (0.24, 1.20) |
| Consolidation   | 0                          | --                | 4                      | 0.25 (0.18, 0.36) | 0                     | --                | 3         | 0.27 (0.18, 0.40) |
| Other           | 4                          | 0.20 (0.15, 0.28) | 5                      | 0.18 (0.08, 0.42) | 1                     | 0.18 (0.05, 0.63) | 1         | 0.20 (0.04, 0.92) |
| Ph chromosome   |                            |                   |                        |                   |                       |                   |           |                   |
| Ph-             | 2                          | 0.17 (0.07, 0.42) | 7                      | 0.28 (0.22, 0.37) | 2                     | 0.27 (0.22, 0.34) | 2         | 0.26 (0.17, 0.40) |
| Ph+             | 0                          | --                | 5                      | 0.34 (0.22, 0.53) | 0                     | --                | 2         | 0.38 (0.19, 0.75) |
| ALL type        |                            |                   |                        |                   |                       |                   |           |                   |
| B-cell          | 9                          | 0.21 (0.14, 0.30) | 2                      | 0.28 (0.17, 0.46) | 2                     | 0.18 (0.09, 0.38) | 0         | --                |
| T-cell          | 0                          | --                | 2                      | 0.31 (0.19, 0.53) | 0                     | --                | 0         | --                |
| Study type      |                            |                   |                        |                   |                       |                   |           |                   |
| RCT             | 11                         | 0.19 (0.12, 0.29) | 4                      | 0.31 (0.21, 0.45) | 3                     | 0.25 (0.08, 0.74) | 0         | --                |
| Database        | 9                          | 0.29 (0.18, 0.45) | 12                     | 0.25 (0.18, 0.33) | 2                     | 0.21 (0.09, 0.51) | 5         | 0.29 (0.19, 0.44) |

**eFigure 1.** Hazard ratios of EFS and their 95% confidence intervals for the individual studies used in our pediatric ALL meta-analysis

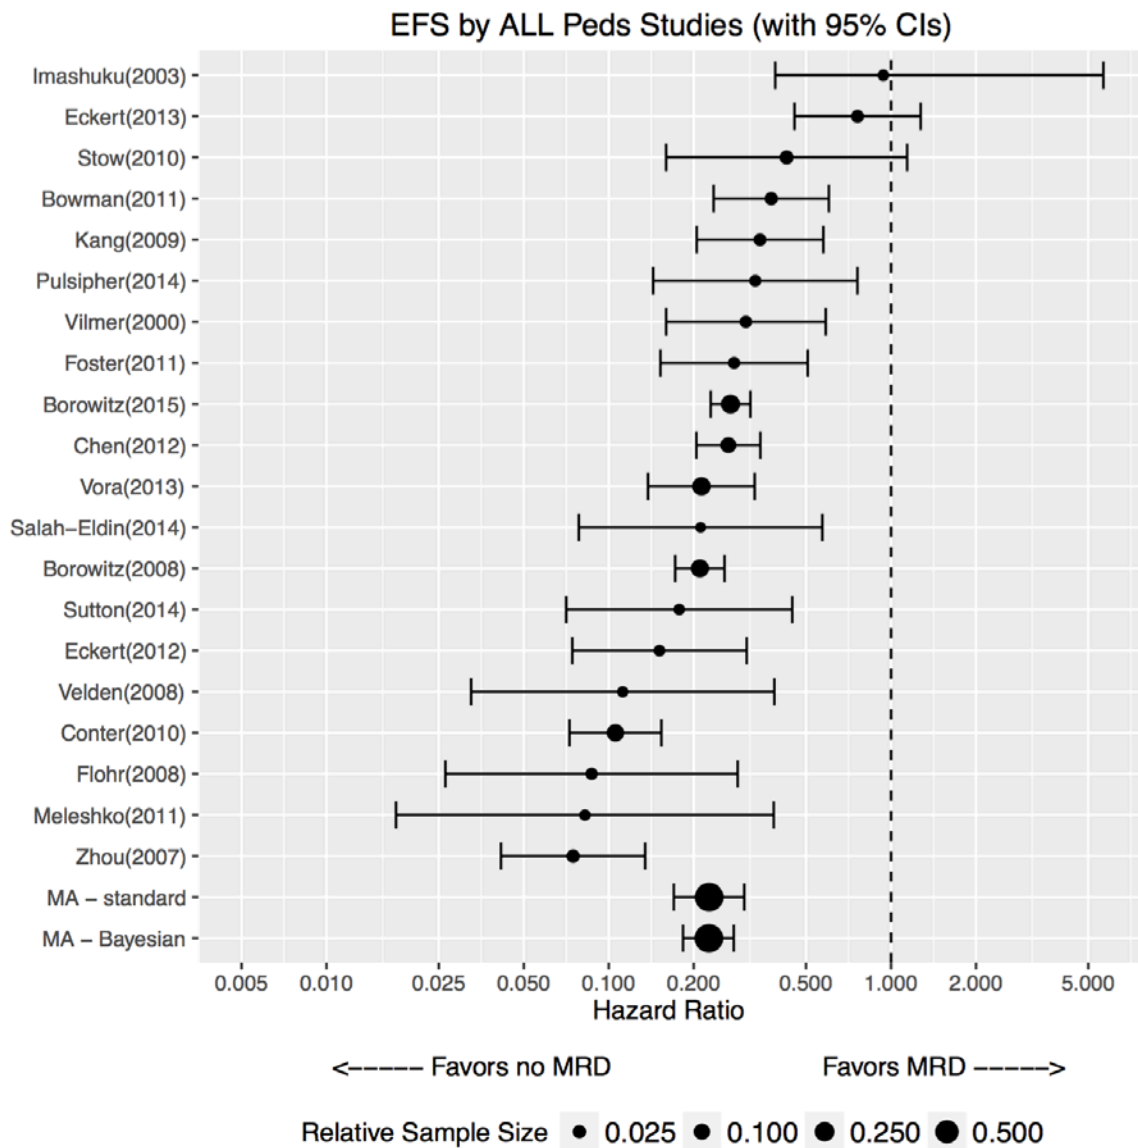

**eFigure 2.** Hazard ratios of EFS and their 95% confidence intervals for the individual studies used in our pediatric ALL meta-analysis

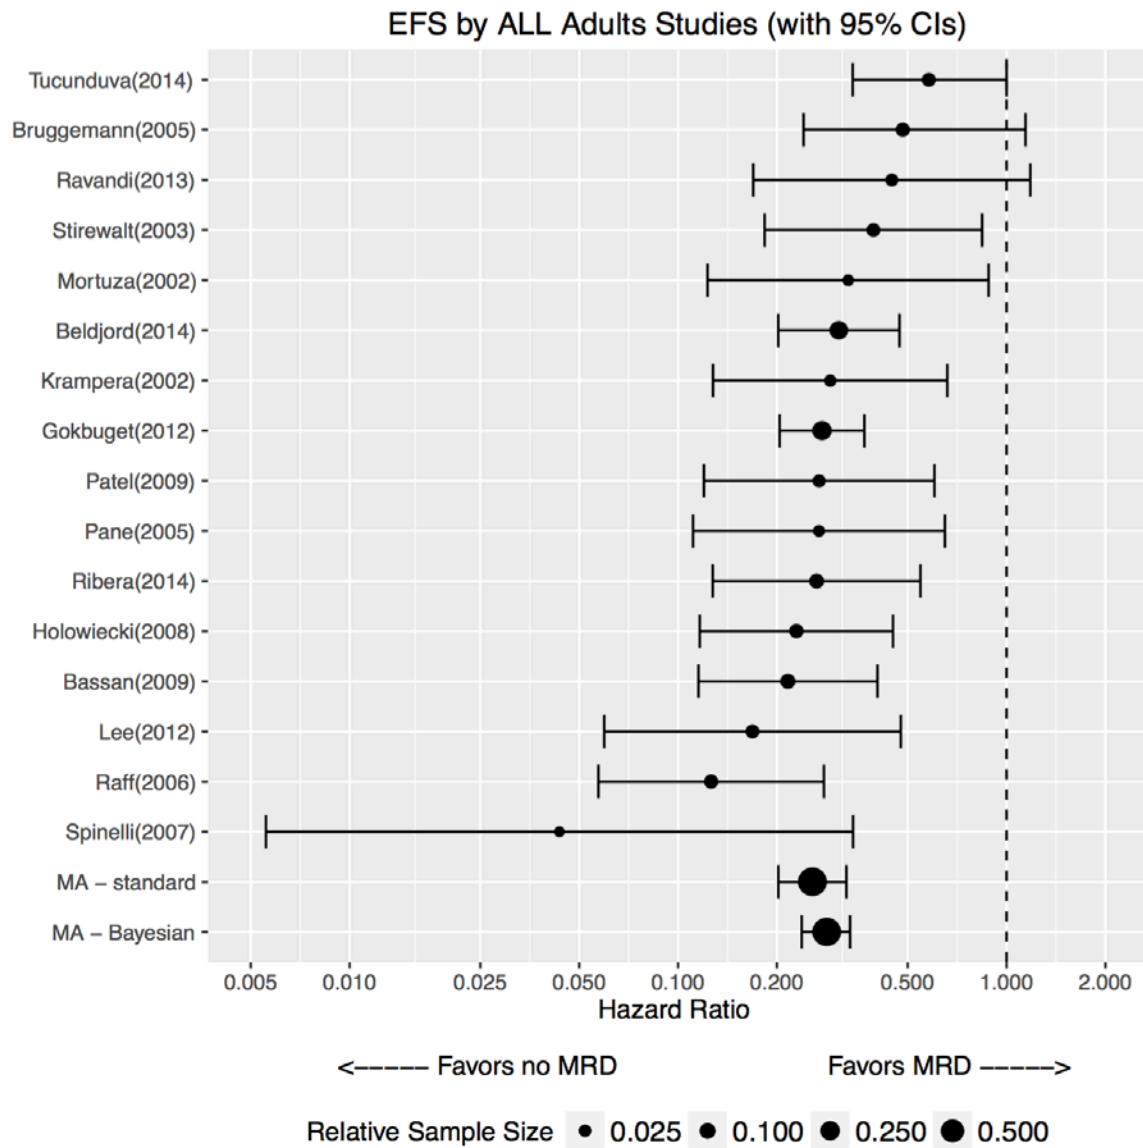

Supplement: jamaoncol-3-2260-s001.pdf [file jamaoncol-3-2260-s001.pdf]
